# Supplementary material for: The Impact of a Tax on Sugar-Sweetened Beverages on Health and Health Care Costs: A Modelling Study
Source: PubMed Central journal article supplement (PMC4830445; doi:10.1371/journal.pone.0151460), 2016-04-13
Supplement: pone.0151460.s002.pdf [file pone.0151460.s002.pdf]

**The impact of a tax on sugar-sweetened beverages on health and health care costs: a modelling study – S1 Table**

**Table S1: Input parameters (ex. relative risks)**

| <i>Parameter</i>                                                                | <i>Value<br/>Mean<br/>(SD)</i>    | <i>Uncertainty<br/>distribution</i> | <i>Sources and assumptions</i>                                                                                                                                                              |
|---------------------------------------------------------------------------------|-----------------------------------|-------------------------------------|---------------------------------------------------------------------------------------------------------------------------------------------------------------------------------------------|
| Sugared drinks consumption                                                      | Varies by age and sex; see source | Normal                              | ABS Australian Health Survey 2011/12; Mean intake 'Soft drinks, and flavoured mineral waters' (g/day)                                                                                       |
| kJ / g of soft drink                                                            | 1.8                               | None                                | CalorieKing.com.au                                                                                                                                                                          |
| Own-price elasticity (regular soft drinks)                                      | -0.63                             | None                                | Sharma et al (1)                                                                                                                                                                            |
| Population numbers                                                              | See source                        | None                                | ABS 3101.0 Australian Demographic Statistics Table 9 – Estimated Resident Population                                                                                                        |
| Overall mortality rates                                                         | See source                        | None                                | ABS 3302.0 - Deaths, Australia, 2010                                                                                                                                                        |
| Body mass index                                                                 | See source                        | None                                | Predictions developed by Haby et al based on 11 cross-sectional national or state population surveys conducted in Australia between 1969 and 2004 (2)                                       |
| Disease epidemiology                                                            | See source                        | None                                | Australian Burden of Disease 2003 with trends extrapolating to 2010 (3)                                                                                                                     |
| Relative risk (RR) of obesity related disease per BMI-unit increase             | See Table S2                      | Normal (ln RR)                      | Relative risks by age from the World Health Organization's Comparative Risk Assessment project, 2003 (4).                                                                                   |
| Health care expenditure                                                         | See source                        | None                                | Australian Institute of Health and Welfare Disease Costs and Impacts Study 2001 (5); inflated to 2010 values using AIHW health price deflators (6)                                          |
| Cost of implementing, administering and enforcement of legislation (government) | 20.3 ; 27.6 ; 34.8 million \$     | Triangular                          | Most likely value based on World Health Organization (WHO) estimate for Australia of cost of changing legislation regarding alcohol use (7). Other values = most likely estimate $\pm 20\%$ |

# The impact of a tax on sugar-sweetened beverages on health and health care costs: a modelling study – S1 Table

---

## References

1. Sharma A, Hauck K, Hollingsworth B, Siciliani L. The effects of taxing sugar-sweetened beverages across different income groups. *Health economics*. 2014;23(9):1159-84.
2. Haby MM, Markwick A, Peeters A, Shaw J, Vos T. Future predictions of body mass index and overweight prevalence in Australia, 2005-2025. *Health Promot Int*. 2012;27(2):250-60.
3. Vos T, Carter R, Barendregt J, Mihalopoulos C, Veerman JL, Magnus A, et al. *Assessing Cost-Effectiveness in Prevention (ACE-Prevention): Final Report*. Brisbane/Melbourne: University of Queensland, Brisbane and Deakin University, Melbourne., 2010.
4. Ezzati M, Lopez AD, Rogers A, Murray CJL. *Comparative Quantification of Health Risks*. Geneva: World Health Organisation; 2003.
5. Australian Institute of Health and Welfare. *Disease costs and impacts study data*. Canberra: Australian Institute of Health and Welfare, 2001.
6. Australian Institute of Health and Welfare. *Health expenditure Australia 2009-10*. Canberra: AIHW, 2011 Contract No.: Cat. no. HWE 55.
7. Chisholm D, Rehm J, Van Ommeren M, Monteiro M. Reducing the global burden of hazardous alcohol use: a comparative cost-effectiveness analysis. *Journal of studies on alcohol*. 2004;65(6):782-93.
