# Supplementary material for: The Impact of a Tax on Sugar-Sweetened Beverages on Health and Health Care Costs: A Modelling Study
Source: PubMed Central journal article supplement (PMC4830445; doi:10.1371/journal.pone.0151460), 2016-04-13
Supplement: pone.0151460.s003.pdf [file pone.0151460.s003.pdf]

**The impact of a tax on sugar-sweetened beverages on health and health care costs: a modelling study – 2 Table**

**Table S2: Relative risks of disease per 1 unit increase of BMI (1, 2)**

|                            | <b>Age</b> | <b>Males</b>     | <b>Females</b>   |
|----------------------------|------------|------------------|------------------|
| Colorectal cancer          | <35        | 1                | 1                |
|                            | 35+        | 1.03 (1.01-1.05) | 1.03 (1.01-1.05) |
| Breast cancer              | <35        | -                | 1                |
|                            | 35+        | -                | 1.03 (1.02-1.04) |
| Endometrial cancer         | <35        | -                | 1.10 (1.07-1.14) |
|                            | 35+        | -                | 1.10 (1.07-1.14) |
| Kidney cancer              | <35        | 1.06 (1.03-1.08) | 1.06 (1.03-1.08) |
|                            | 35+        | 1.06 (1.03-1.08) | 1.06 (1.03-1.08) |
| Osteoarthritis             | <35        | 1.04 (1.03-1.06) | 1.04 (1.03-1.06) |
|                            | 35+        | 1.04 (1.03-1.06) | 1.04 (1.03-1.06) |
| Ischemic heart disease     | <35        | 1                | 1                |
|                            | 35-44      | 1.12 (1.05-1.19) | 1.12 (1.05-1.19) |
|                            | 45-59      | 1.10 (1.08-1.14) | 1.10 (1.08-1.14) |
|                            | 60-69      | 1.06 (1.03-1.08) | 1.06 (1.03-1.08) |
|                            | 70-79      | 1.04 (1.02-1.06) | 1.04 (1.02-1.06) |
|                            | 80+        | 1.02 (1.00-1.05) | 1.02 (1.00-1.05) |
| Hypertensive heart disease | <45        | 1                | 1                |
|                            | 45-59      | 1.09 (1.03-1.14) | 1.09 (1.03-1.14) |
|                            | 60-69      | 1.16 (1.05-1.27) | 1.16 (1.05-1.27) |
|                            | 70-79      | 1.12 (1.04-1.21) | 1.12 (1.04-1.21) |
|                            | 80+        | 1.06 (1.02-1.11) | 1.06 (1.02-1.11) |
| Stroke                     | <35        | 1                | 1                |
|                            | 35-44      | 1.14 (1.05-1.23) | 1.14 (1.05-1.23) |
|                            | 45-59      | 1.10 (1.03-1.16) | 1.10 (1.03-1.16) |
|                            | 60-69      | 1.08 (1.03-1.13) | 1.08 (1.03-1.13) |
|                            | 70-79      | 1.05 (1.02-1.09) | 1.05 (1.02-1.09) |
|                            | 80+        | 1.03 (1.01-1.05) | 1.03 (1.01-1.05) |
| Type II Diabetes           | <35        | 1                | 1                |
|                            | 35-44      | 1.19 (1.06-1.32) | 1.19 (1.06-1.32) |
|                            | 45-69      | 1.14 (1.05-1.23) | 1.14 (1.05-1.23) |
|                            | 70+        | 1.10 (1.03-1.16) | 1.10 (1.03-1.16) |

NB. Values shown are the mean and 95% confidence intervals.

## **The impact of a tax on sugar-sweetened beverages on health and health care costs: a modelling study – 2 Table**

---

### **References**

1. Ni Mhurchu C, Parag V, Nakamura M, Patel A, Rodgers A, Lam TH. Body mass index and risk of diabetes mellitus in the Asia-Pacific region. *Asia Pac J Clin Nutr*. 2006;15(2):127-33.
2. James WP, Jackson-Leach R, Ni Mhurchu C, Kalamara E, Shayeghi M, Rigby NJ, et al. Overweight and obesity (high body mass index). In: Ezzati M, Lopez AD, Rodgers A, Murray CJL, editors. *Comparative quantification of health risks*. 1. Geneva: World Health Organization; 2004. p. 497-596.
