# Supplementary material for: The Impact of a Tax on Sugar-Sweetened Beverages on Health and Health Care Costs: A Modelling Study
Source: PubMed Central journal article supplement (PMC4830445; doi:10.1371/journal.pone.0151460), 2016-04-13
Supplement: pone.0151460.s004.pdf [file pone.0151460.s004.pdf]

## The impact of a tax on sugar-sweetened beverages on health and health care costs: a modelling study – S3 Table

**Table S3. Results of nine diseases over the first 25 years after the introduction of the tax**

Expected numbers (with 95% uncertainty ranges) of incident cases, prevalent cases and deaths averted in the first to 25<sup>th</sup> year after implementation of a 20% tax on sugar-sweetened beverages in Australia. For incidence and mortality, numbers are for the stated year. For prevalence, they refer to the end of that year (e.g. Year 1 refers to prevalent numbers at 1 year after the tax change took effect).

|                   | Ischaemic health disease | Hypertensive heart disease | Stroke              | Type 2 diabetes mellitus | Osteo-arthritis      | Colorectal cancer | Breast cancer    | Endometrial cancer | Kidney cancer    | Any cause |
|-------------------|--------------------------|----------------------------|---------------------|--------------------------|----------------------|-------------------|------------------|--------------------|------------------|-----------|
| <b>INCIDENCE</b>  |                          |                            |                     |                          |                      |                   |                  |                    |                  |           |
| Year 1            | 224<br>(157-295)         | 7<br>(4-11)                | 62<br>(31-93)       | 757<br>(379-1126)        | 78<br>(56-100)       | 17<br>(8-27)      | 16<br>(10-21)    | 5<br>(3-7)         | 8<br>(6-11)      |           |
| Year 5            | 237<br>(163-316)         | 8<br>(4-13)                | 68<br>(33-105)      | 810<br>(394-1245)        | 83<br>(60-106)       | 19<br>(9-30)      | 17<br>(11-23)    | 6<br>(4-8)         | 9<br>(6-12)      |           |
| Year 10           | 251<br>(171-339)         | 9<br>(5-15)                | 75<br>(36-118)      | 864<br>(410-1369)        | 89<br>(63-115)       | 21<br>(10-32)     | 18<br>(12-24)    | 7<br>(4-10)        | 10<br>(7-14)     |           |
| Year 15           | 254<br>(170-348)         | 11<br>(5-18)               | 80<br>(38-128)      | 880<br>(411-1413)        | 92<br>(65-120)       | 22<br>(10-34)     | 18<br>(12-25)    | 7<br>(4-11)        | 11<br>(7-15)     |           |
| Year 20           | 240<br>(159-329)         | 12<br>(6-20)               | 75<br>(34-120)      | 740<br>(348-1175)        | 89<br>(62-117)       | 22<br>(9-35)      | 18<br>(11-24)    | 8<br>(5-11)        | 11<br>(7-16)     |           |
| Year 25           | 208<br>(137-285)         | 13<br>(6-21)               | 66<br>(29-109)      | 542<br>(258-841)         | 83<br>(56-110)       | 21<br>(8-34)      | 16<br>(10-22)    | 7<br>(4-11)        | 11<br>(7-16)     |           |
| Cumulative 0-25   | 6,350<br>(4312-8591)     | 269<br>(135-436)           | 1,895<br>(897-3016) | 20,088<br>(9671-31487)   | 2,227<br>(1578-2893) | 527<br>(237-834)  | 441<br>(290-598) | 172<br>(105-250)   | 262<br>(171-365) |           |
| <b>PREVALENCE</b> |                          |                            |                     |                          |                      |                   |                  |                    |                  |           |
| Year 1            | 111<br>(78-146)          | 3<br>(2-5)                 | 30<br>(15-46)       | 378<br>(189-562)         | 39<br>(28-50)        | 8<br>(4-13)       | 8<br>(5-10)      | 2<br>(2-3)         | 4<br>(3-5)       |           |
| Year 5            | 1,009<br>(703-1331)      | 23<br>(12-35)              | 268<br>(133-408)    | 3,400<br>(1679-5123)     | 342<br>(247-444)     | 70<br>(33-108)    | 67<br>(44-90)    | 22<br>(14-31)      | 34<br>(23-47)    |           |
| Year 10           | 2,095                    | 37                         | 546                 | 7,191                    | 701                  | 129               | 136              | 48                 | 67               |           |

## The impact of a tax on sugar-sweetened beverages on health and health care costs: a modelling study – S3 Table

|         |                      |               |                     |                        |                     |                 |                  |                 |                 |
|---------|----------------------|---------------|---------------------|------------------------|---------------------|-----------------|------------------|-----------------|-----------------|
| Year 15 | (1457-2780)<br>3,082 | (20-59)<br>48 | (266-845)<br>798    | (3485-11030)<br>10,861 | (501-908)<br>1,020  | (60-202)<br>172 | (89-184)<br>197  | (30-67)<br>73   | (44-92)<br>94   |
| Year 20 | (2141-4103)<br>3,891 | (24-77)<br>57 | (383-1258)<br>1,002 | (5176-16879)<br>13,999 | (719-1332)<br>1,271 | (77-271)<br>198 | (128-267)<br>246 | (45-104)<br>96  | (61-130)<br>114 |
| Year 25 | (2688-5215)<br>4,426 | (28-94)<br>62 | (473-1605)<br>1,118 | (6646-22016)<br>15,875 | (886-1672)<br>1,427 | (84-319)<br>208 | (159-337)<br>279 | (58-139)<br>113 | (74-159)<br>126 |
|         | (3047-5939)          | (29-105)      | (521-1809)          | (7480-25050)           | (979-1896)          | (82-342)        | (176-385)        | (68-166)        | (81-177)        |

### MORTALITY

|                 |                   |                 |                  |                  |            |                 |               |               |                  |                      |
|-----------------|-------------------|-----------------|------------------|------------------|------------|-----------------|---------------|---------------|------------------|----------------------|
| Year 1          | 1<br>(1-2)        | 0<br>(0-1)      | 1<br>(0-1)       | 0<br>(0-1)       | 0<br>(0-0) | 0<br>(0-1)      | 0<br>(0-0)    | 0<br>(0-0)    | 6<br>(4-9)       | 4<br>(3-4)           |
| Year 5          | 12<br>(7-16)      | 3<br>(1-4)      | 6<br>(3-10)      | 5<br>(2-7)       | 0<br>(0-0) | 3<br>(2-5)      | 1<br>(1-2)    | 0<br>(0-0)    | 7<br>(4-10)      | 30<br>(24-37)        |
| Year 10         | 25<br>(16-35)     | 4<br>(2-7)      | 13<br>(6-20)     | 11<br>(5-17)     | 0<br>(0-0) | 6<br>(3-9)      | 2<br>(2-3)    | 1<br>(0-1)    | 7<br>(4-11)      | 59<br>(46-73)        |
| Year 15         | 39<br>(25-54)     | 6<br>(3-9)      | 19<br>(9-30)     | 18<br>(8-28)     | 0<br>(0-0) | 8<br>(4-13)     | 3<br>(2-5)    | 1<br>(1-1)    | 8<br>(5-12)      | 83<br>(65-103)       |
| Year 20         | 53<br>(34-74)     | 7<br>(3-11)     | 26<br>(11-41)    | 26<br>(12-41)    | 0<br>(0-0) | 9<br>(4-15)     | 4<br>(3-6)    | 1<br>(1-2)    | 8<br>(5-13)      | 101<br>(79-126)      |
| Year 25         | 64<br>(41-90)     | 7<br>(4-13)     | 30<br>(13-50)    | 33<br>(15-52)    | 0<br>(0-0) | 10<br>(4-16)    | 4<br>(3-6)    | 1<br>(1-2)    | 8<br>(4-12)      | 107<br>(83-133)      |
| Cumulative 0-25 | 839<br>(535-1173) | 125<br>(63-202) | 419<br>(192-668) | 396<br>(182-625) | 1<br>(0-1) | 162<br>(70-258) | 69<br>(45-94) | 20<br>(12-28) | 195<br>(112-292) | 1,606<br>(1252-1986) |
